# Supplementary material for: Insight into structural properties of polyethylene glycol monolaurate in water and alcohols from molecular dynamics studies
Source: Royal Society of Chemistry journal article supplement (doi:10.1039/c9ra09688d), 2020-01-01
Supplement: c9ra09688d1.pdf [file c9ra09688d1.pdf]

## Supplementary Information

# Insight into structural properties of polyethylene glycol monolaurate in water alcohols from molecular dynamics studies

Ianatul Khoiroh,<sup>a\*</sup> Sze Ying Lee<sup>b</sup>, Mohsen Pirdashti<sup>c</sup>, and Ming-Jer Lee<sup>d</sup>

<sup>a</sup> Department of Chemical & Environmental Engineering, University of Nottingham Malaysia Campus, Jalan Broga, 43500 Semenyih, Selangor Darul Ehsan, Malaysia.

<sup>b</sup> Department of Chemical Engineering, Faculty of Engineering and Science, Universiti Tunku Abdul Rahman, Sungai Long Campus, Kajang 43000, Selangor, Malaysia.

<sup>c</sup> Chemical Engineering Department, Faculty of Engineering, Shomal University, Amol, PO Box 731, Iran.

<sup>d</sup> Department of Chemical Engineering, National Taiwan University of Science and Technology, 43 Keelung Road, Section 4, Taipei 106-07, Taiwan.

**Table S.1**

Include file for topology (itp file) of PEGML and the calculated atomic charges by using AM1-BCC. Atomic numbering is given in Figure S.1.

```
[ moleculetype ]
; Name          nrexcl
PEGML           3

[ atoms ]
; nr  type      resnr residue  atom  cgnr      charge      mass
  1  opl_490    1      ML      C1     1    -0.0141079
  2  opl_182    1      ML      C2     2    -0.0213862
  3  opl_180    1      ML      O1     2    -0.2826303
  4  opl_465    1      ML      C3     3     0.3040785
  5  opl_136    1      ML      C4     4    -0.1545249
  6  opl_136    1      ML      C5     5    -0.1549852
  7  opl_136    1      ML      C6     6    -0.1592751
  8  opl_136    1      ML      C7     7    -0.1567743
  9  opl_136    1      ML      C8     8    -0.1579672
 10  opl_136    1      ML      C9     9    -0.1574738
 11  opl_136    1      ML     C10    10   -0.1576485
 12  opl_136    1      ML     C11    11   -0.1576251
 13  opl_136    1      ML     C12    12   -0.1579151
 14  opl_136    1      ML     C13    13   -0.1586728
 15  opl_135    1      ML     C14    14   -0.2105497
 16  opl_466    1      ML      O2     3    -0.3536118
 17  opl_467    1      ML      O3     3    -0.2813521
 18  opl_182    1      ML     C15    15   -0.0205762
 19  opl_182    1      ML     C16    16   -0.0207722
 20  opl_180    1      ML      O4    16   -0.2866073
 21  opl_182    1      ML     C17    17   -0.0207861
 22  opl_182    1      ML     C18    18   -0.0203461
 23  opl_180    1      ML      O5    18   -0.2861399
 24  opl_182    1      ML     C19    19   -0.0204555
 25  opl_182    1      ML     C20    20   -0.0203821
 26  opl_180    1      ML      O6    20   -0.2877822
 27  opl_182    1      ML     C21    21   -0.0207379
 28  opl_157    1      ML     C22    22   -0.0229443
 29  opl_154    1      ML      O7    22   -0.3297824
 30  opl_469    1      ML      H1     1     0.1055632
 31  opl_469    1      ML      H2     1     0.1053012
 32  opl_185    1      ML      H3     2     0.0803985
 33  opl_185    1      ML      H4     2     0.0805453
 34  opl_140    1      ML      H5     4     0.1200091
 35  opl_140    1      ML      H6     4     0.1199183
 36  opl_140    1      ML      H7     5     0.0953492
 37  opl_140    1      ML      H8     5     0.0948379
 38  opl_140    1      ML      H9     6     0.0801070
 39  opl_140    1      ML     H10    6     0.0800527
 40  opl_140    1      ML     H11    7     0.0812427
 41  opl_140    1      ML     H12    7     0.0812498
 42  opl_140    1      ML     H13    8     0.0793930
 43  opl_140    1      ML     H14    8     0.0793732
 44  opl_140    1      ML     H15    9     0.0793988
 45  opl_140    1      ML     H16    9     0.0794083
```

|    |          |   |    |     |    |           |
|----|----------|---|----|-----|----|-----------|
| 46 | opls_140 | 1 | ML | H17 | 10 | 0.0790358 |
| 47 | opls_140 | 1 | ML | H18 | 10 | 0.0790279 |
| 48 | opls_140 | 1 | ML | H19 | 11 | 0.0788398 |
| 49 | opls_140 | 1 | ML | H20 | 11 | 0.0788449 |
| 50 | opls_140 | 1 | ML | H21 | 12 | 0.0788458 |
| 51 | opls_140 | 1 | ML | H22 | 12 | 0.0788427 |
| 52 | opls_140 | 1 | ML | H23 | 13 | 0.0777308 |
| 53 | opls_140 | 1 | ML | H24 | 13 | 0.0777341 |
| 54 | opls_140 | 1 | ML | H25 | 14 | 0.0719831 |
| 55 | opls_140 | 1 | ML | H26 | 14 | 0.0718759 |
| 56 | opls_140 | 1 | ML | H27 | 14 | 0.0718732 |
| 57 | opls_185 | 1 | ML | H28 | 15 | 0.0817593 |
| 58 | opls_185 | 1 | ML | H29 | 15 | 0.0816882 |
| 59 | opls_185 | 1 | ML | H30 | 16 | 0.0829934 |
| 60 | opls_185 | 1 | ML | H31 | 16 | 0.0830945 |
| 61 | opls_185 | 1 | ML | H32 | 17 | 0.0823998 |
| 62 | opls_185 | 1 | ML | H33 | 17 | 0.0823872 |
| 63 | opls_185 | 1 | ML | H34 | 18 | 0.0814915 |
| 64 | opls_185 | 1 | ML | H35 | 18 | 0.0815223 |
| 65 | opls_185 | 1 | ML | H36 | 19 | 0.0814240 |
| 66 | opls_185 | 1 | ML | H37 | 19 | 0.0814311 |
| 67 | opls_185 | 1 | ML | H38 | 20 | 0.0819437 |
| 68 | opls_185 | 1 | ML | H39 | 20 | 0.0819366 |
| 69 | opls_185 | 1 | ML | H40 | 21 | 0.0823078 |
| 70 | opls_185 | 1 | ML | H41 | 21 | 0.0822967 |
| 71 | opls_140 | 1 | ML | H42 | 22 | 0.0749899 |
| 72 | opls_140 | 1 | ML | H43 | 22 | 0.0750044 |
| 73 | opls_155 | 1 | ML | H44 | 22 | 0.2042815 |

[ bonds ]

| ; | ai | aj | funct | b0 | kb |
|---|----|----|-------|----|----|
|   | 1  | 2  | 1     |    |    |
|   | 1  | 17 | 1     |    |    |
|   | 1  | 30 | 1     |    |    |
|   | 1  | 31 | 1     |    |    |
|   | 2  | 3  | 1     |    |    |
|   | 2  | 32 | 1     |    |    |
|   | 2  | 33 | 1     |    |    |
|   | 3  | 18 | 1     |    |    |
|   | 4  | 5  | 1     |    |    |
|   | 4  | 16 | 1     |    |    |
|   | 4  | 17 | 1     |    |    |
|   | 5  | 6  | 1     |    |    |
|   | 5  | 34 | 1     |    |    |
|   | 5  | 35 | 1     |    |    |
|   | 6  | 7  | 1     |    |    |
|   | 6  | 36 | 1     |    |    |
|   | 6  | 37 | 1     |    |    |
|   | 7  | 8  | 1     |    |    |
|   | 7  | 38 | 1     |    |    |
|   | 7  | 39 | 1     |    |    |
|   | 8  | 9  | 1     |    |    |
|   | 8  | 40 | 1     |    |    |
|   | 8  | 41 | 1     |    |    |
|   | 9  | 10 | 1     |    |    |
|   | 9  | 42 | 1     |    |    |

```

9      43  1
10     11  1
10     44  1
10     45  1
11     12  1
11     46  1
11     47  1
12     13  1
12     48  1
12     49  1
13     14  1
13     50  1
13     51  1
14     15  1
14     52  1
14     53  1
15     54  1
15     55  1
15     56  1
18     19  1
18     57  1
18     58  1
19     20  1
19     59  1
19     60  1
20     21  1
21     22  1
21     61  1
21     62  1
22     23  1
22     63  1
22     64  1
23     24  1
24     25  1
24     65  1
24     66  1
25     26  1
25     67  1
25     68  1
26     27  1
27     28  1
27     69  1
27     70  1
28     29  1
28     71  1
28     72  1
29     73  1

```

```

[ angles ]
; ai  aj  ak  funct  th0  cth
  1   2   3   1
  1   2  32   1
  1   2  33   1
  1  17   4   1
  2   1  17   1
  2   1  30   1

```

|    |    |    |   |
|----|----|----|---|
| 2  | 1  | 31 | 1 |
| 2  | 3  | 18 | 1 |
| 3  | 2  | 32 | 1 |
| 3  | 2  | 33 | 1 |
| 3  | 18 | 19 | 1 |
| 3  | 18 | 57 | 1 |
| 3  | 18 | 58 | 1 |
| 5  | 4  | 16 | 1 |
| 5  | 4  | 17 | 1 |
| 5  | 6  | 7  | 1 |
| 5  | 6  | 36 | 1 |
| 5  | 6  | 37 | 1 |
| 6  | 5  | 34 | 1 |
| 6  | 5  | 35 | 1 |
| 6  | 7  | 8  | 1 |
| 6  | 7  | 38 | 1 |
| 6  | 7  | 39 | 1 |
| 7  | 6  | 36 | 1 |
| 7  | 6  | 37 | 1 |
| 7  | 8  | 9  | 1 |
| 7  | 8  | 40 | 1 |
| 7  | 8  | 41 | 1 |
| 8  | 7  | 38 | 1 |
| 8  | 7  | 39 | 1 |
| 8  | 9  | 10 | 1 |
| 8  | 9  | 42 | 1 |
| 8  | 9  | 43 | 1 |
| 9  | 8  | 40 | 1 |
| 9  | 8  | 41 | 1 |
| 9  | 10 | 11 | 1 |
| 9  | 10 | 44 | 1 |
| 9  | 10 | 45 | 1 |
| 10 | 9  | 42 | 1 |
| 10 | 9  | 43 | 1 |
| 10 | 11 | 12 | 1 |
| 10 | 11 | 46 | 1 |
| 10 | 11 | 47 | 1 |
| 11 | 10 | 44 | 1 |
| 11 | 10 | 45 | 1 |
| 11 | 12 | 13 | 1 |
| 11 | 12 | 48 | 1 |
| 11 | 12 | 49 | 1 |
| 12 | 11 | 46 | 1 |
| 12 | 11 | 47 | 1 |
| 12 | 13 | 14 | 1 |
| 12 | 13 | 50 | 1 |
| 12 | 13 | 51 | 1 |
| 13 | 12 | 48 | 1 |
| 13 | 12 | 49 | 1 |
| 13 | 14 | 15 | 1 |
| 13 | 14 | 52 | 1 |
| 13 | 14 | 53 | 1 |
| 14 | 13 | 50 | 1 |
| 14 | 13 | 51 | 1 |
| 14 | 15 | 54 | 1 |
| 14 | 15 | 55 | 1 |

|    |    |    |   |
|----|----|----|---|
| 14 | 15 | 56 | 1 |
| 15 | 14 | 52 | 1 |
| 15 | 14 | 53 | 1 |
| 16 | 4  | 17 | 1 |
| 17 | 1  | 30 | 1 |
| 17 | 1  | 31 | 1 |
| 18 | 19 | 20 | 1 |
| 18 | 19 | 59 | 1 |
| 18 | 19 | 60 | 1 |
| 19 | 18 | 57 | 1 |
| 19 | 18 | 58 | 1 |
| 19 | 20 | 21 | 1 |
| 20 | 19 | 59 | 1 |
| 20 | 19 | 60 | 1 |
| 20 | 21 | 22 | 1 |
| 20 | 21 | 61 | 1 |
| 20 | 21 | 62 | 1 |
| 21 | 22 | 23 | 1 |
| 21 | 22 | 63 | 1 |
| 21 | 22 | 64 | 1 |
| 22 | 21 | 61 | 1 |
| 22 | 21 | 62 | 1 |
| 22 | 23 | 24 | 1 |
| 23 | 22 | 63 | 1 |
| 23 | 22 | 64 | 1 |
| 23 | 24 | 25 | 1 |
| 23 | 24 | 65 | 1 |
| 23 | 24 | 66 | 1 |
| 24 | 25 | 26 | 1 |
| 24 | 25 | 67 | 1 |
| 24 | 25 | 68 | 1 |
| 25 | 24 | 65 | 1 |
| 25 | 24 | 66 | 1 |
| 25 | 26 | 27 | 1 |
| 26 | 25 | 67 | 1 |
| 26 | 25 | 68 | 1 |
| 26 | 27 | 28 | 1 |
| 26 | 27 | 69 | 1 |
| 26 | 27 | 70 | 1 |
| 27 | 28 | 29 | 1 |
| 27 | 28 | 71 | 1 |
| 27 | 28 | 72 | 1 |
| 28 | 27 | 69 | 1 |
| 28 | 27 | 70 | 1 |
| 28 | 29 | 73 | 1 |
| 29 | 28 | 71 | 1 |
| 29 | 28 | 72 | 1 |
| 30 | 1  | 31 | 1 |
| 32 | 2  | 33 | 1 |
| 34 | 5  | 35 | 1 |
| 36 | 6  | 37 | 1 |
| 38 | 7  | 39 | 1 |
| 40 | 8  | 41 | 1 |
| 42 | 9  | 43 | 1 |
| 44 | 10 | 45 | 1 |
| 46 | 11 | 47 | 1 |

|    |    |    |   |
|----|----|----|---|
| 48 | 12 | 49 | 1 |
| 50 | 13 | 51 | 1 |
| 52 | 14 | 53 | 1 |
| 54 | 15 | 55 | 1 |
| 54 | 15 | 56 | 1 |
| 55 | 15 | 56 | 1 |
| 57 | 18 | 58 | 1 |
| 59 | 19 | 60 | 1 |
| 61 | 21 | 62 | 1 |
| 63 | 22 | 64 | 1 |
| 65 | 24 | 66 | 1 |
| 67 | 25 | 68 | 1 |
| 69 | 27 | 70 | 1 |
| 71 | 28 | 72 | 1 |

[ dihedrals ]

| ; | ai | aj | ak | al | funct | ph0 | cp | mult |
|---|----|----|----|----|-------|-----|----|------|
|   | 17 | 1  | 2  | 3  | 3     |     |    |      |
|   | 30 | 1  | 2  | 3  | 3     |     |    |      |
|   | 31 | 1  | 2  | 3  | 3     |     |    |      |
|   | 17 | 1  | 2  | 32 | 3     |     |    |      |
|   | 30 | 1  | 2  | 32 | 3     |     |    |      |
|   | 31 | 1  | 2  | 32 | 3     |     |    |      |
|   | 17 | 1  | 2  | 33 | 3     |     |    |      |
|   | 30 | 1  | 2  | 33 | 3     |     |    |      |
|   | 31 | 1  | 2  | 33 | 3     |     |    |      |
|   | 2  | 1  | 17 | 4  | 3     |     |    |      |
|   | 30 | 1  | 17 | 4  | 3     |     |    |      |
|   | 31 | 1  | 17 | 4  | 3     |     |    |      |
|   | 1  | 2  | 3  | 18 | 3     |     |    |      |
|   | 32 | 2  | 3  | 18 | 3     |     |    |      |
|   | 33 | 2  | 3  | 18 | 3     |     |    |      |
|   | 2  | 3  | 18 | 19 | 3     |     |    |      |
|   | 2  | 3  | 18 | 57 | 3     |     |    |      |
|   | 2  | 3  | 18 | 58 | 3     |     |    |      |
|   | 6  | 5  | 4  | 17 | 3     |     |    |      |
|   | 34 | 5  | 4  | 17 | 3     |     |    |      |
|   | 35 | 5  | 4  | 17 | 3     |     |    |      |
|   | 4  | 5  | 6  | 7  | 3     |     |    |      |
|   | 34 | 5  | 6  | 7  | 3     |     |    |      |
|   | 35 | 5  | 6  | 7  | 3     |     |    |      |
|   | 4  | 5  | 6  | 36 | 3     |     |    |      |
|   | 34 | 5  | 6  | 36 | 3     |     |    |      |
|   | 35 | 5  | 6  | 36 | 3     |     |    |      |
|   | 4  | 5  | 6  | 37 | 3     |     |    |      |
|   | 34 | 5  | 6  | 37 | 3     |     |    |      |
|   | 35 | 5  | 6  | 37 | 3     |     |    |      |
|   | 5  | 6  | 7  | 8  | 3     |     |    |      |
|   | 36 | 6  | 7  | 8  | 3     |     |    |      |
|   | 37 | 6  | 7  | 8  | 3     |     |    |      |
|   | 5  | 6  | 7  | 38 | 3     |     |    |      |
|   | 36 | 6  | 7  | 38 | 3     |     |    |      |
|   | 37 | 6  | 7  | 38 | 3     |     |    |      |
|   | 5  | 6  | 7  | 39 | 3     |     |    |      |
|   | 36 | 6  | 7  | 39 | 3     |     |    |      |
|   | 37 | 6  | 7  | 39 | 3     |     |    |      |

|    |    |    |    |   |
|----|----|----|----|---|
| 6  | 7  | 8  | 9  | 3 |
| 38 | 7  | 8  | 9  | 3 |
| 6  | 7  | 8  | 40 | 3 |
| 38 | 7  | 8  | 40 | 3 |
| 39 | 7  | 8  | 40 | 3 |
| 6  | 7  | 8  | 41 | 3 |
| 38 | 7  | 8  | 41 | 3 |
| 39 | 7  | 8  | 41 | 3 |
| 7  | 8  | 9  | 10 | 3 |
| 40 | 8  | 9  | 10 | 3 |
| 41 | 8  | 9  | 10 | 3 |
| 7  | 8  | 9  | 42 | 3 |
| 40 | 8  | 9  | 42 | 3 |
| 41 | 8  | 9  | 42 | 3 |
| 7  | 8  | 9  | 43 | 3 |
| 40 | 8  | 9  | 43 | 3 |
| 8  | 9  | 10 | 11 | 3 |
| 42 | 9  | 10 | 11 | 3 |
| 43 | 9  | 10 | 11 | 3 |
| 8  | 9  | 10 | 44 | 3 |
| 42 | 9  | 10 | 44 | 3 |
| 43 | 9  | 10 | 44 | 3 |
| 8  | 9  | 10 | 45 | 3 |
| 42 | 9  | 10 | 45 | 3 |
| 43 | 9  | 10 | 45 | 3 |
| 9  | 10 | 11 | 12 | 3 |
| 44 | 10 | 11 | 12 | 3 |
| 45 | 10 | 11 | 12 | 3 |
| 9  | 10 | 11 | 46 | 3 |
| 44 | 10 | 11 | 46 | 3 |
| 45 | 10 | 11 | 46 | 3 |
| 9  | 10 | 11 | 47 | 3 |
| 44 | 10 | 11 | 47 | 3 |
| 45 | 10 | 11 | 47 | 3 |
| 10 | 11 | 12 | 13 | 3 |
| 46 | 11 | 12 | 13 | 3 |
| 47 | 11 | 12 | 13 | 3 |
| 10 | 11 | 12 | 48 | 3 |
| 46 | 11 | 12 | 48 | 3 |
| 47 | 11 | 12 | 48 | 3 |
| 10 | 11 | 12 | 49 | 3 |
| 46 | 11 | 12 | 49 | 3 |
| 47 | 11 | 12 | 49 | 3 |
| 48 | 12 | 13 | 14 | 3 |
| 49 | 12 | 13 | 14 | 3 |
| 11 | 12 | 13 | 50 | 3 |
| 48 | 12 | 13 | 50 | 3 |
| 49 | 12 | 13 | 50 | 3 |
| 11 | 12 | 13 | 51 | 3 |
| 48 | 12 | 13 | 51 | 3 |
| 49 | 12 | 13 | 51 | 3 |
| 12 | 13 | 14 | 15 | 3 |
| 50 | 13 | 14 | 15 | 3 |
| 51 | 13 | 14 | 15 | 3 |
| 12 | 13 | 14 | 52 | 3 |
| 50 | 13 | 14 | 52 | 3 |



|    |    |    |    |   |
|----|----|----|----|---|
| 51 | 13 | 14 | 52 | 3 |
| 12 | 13 | 14 | 53 | 3 |
| 50 | 13 | 14 | 53 | 3 |
| 51 | 13 | 14 | 53 | 3 |
| 13 | 14 | 15 | 54 | 3 |
| 52 | 14 | 15 | 54 | 3 |
| 53 | 14 | 15 | 54 | 3 |
| 13 | 14 | 15 | 55 | 3 |
| 52 | 14 | 15 | 55 | 3 |
| 53 | 14 | 15 | 55 | 3 |
| 52 | 14 | 15 | 56 | 3 |
| 53 | 14 | 15 | 56 | 3 |
| 3  | 18 | 19 | 20 | 3 |
| 57 | 18 | 19 | 20 | 3 |
| 58 | 18 | 19 | 20 | 3 |
| 3  | 18 | 19 | 59 | 3 |
| 57 | 18 | 19 | 59 | 3 |
| 58 | 18 | 19 | 59 | 3 |
| 3  | 18 | 19 | 60 | 3 |
| 57 | 18 | 19 | 60 | 3 |
| 58 | 18 | 19 | 60 | 3 |
| 18 | 19 | 20 | 21 | 3 |
| 59 | 19 | 20 | 21 | 3 |
| 60 | 19 | 20 | 21 | 3 |
| 19 | 20 | 21 | 22 | 3 |
| 19 | 20 | 21 | 61 | 3 |
| 19 | 20 | 21 | 62 | 3 |
| 20 | 21 | 22 | 23 | 3 |
| 61 | 21 | 22 | 23 | 3 |
| 62 | 21 | 22 | 23 | 3 |
| 20 | 21 | 22 | 63 | 3 |
| 61 | 21 | 22 | 63 | 3 |
| 62 | 21 | 22 | 63 | 3 |
| 20 | 21 | 22 | 64 | 3 |
| 61 | 21 | 22 | 64 | 3 |
| 62 | 21 | 22 | 64 | 3 |
| 21 | 22 | 23 | 24 | 3 |
| 63 | 22 | 23 | 24 | 3 |
| 64 | 22 | 23 | 24 | 3 |
| 22 | 23 | 24 | 25 | 3 |
| 22 | 23 | 24 | 65 | 3 |
| 22 | 23 | 24 | 66 | 3 |
| 23 | 24 | 25 | 26 | 3 |
| 65 | 24 | 25 | 26 | 3 |
| 23 | 24 | 25 | 67 | 3 |
| 65 | 24 | 25 | 67 | 3 |
| 66 | 24 | 25 | 67 | 3 |
| 23 | 24 | 25 | 68 | 3 |
| 65 | 24 | 25 | 68 | 3 |
| 66 | 24 | 25 | 68 | 3 |
| 67 | 25 | 26 | 27 | 3 |
| 68 | 25 | 26 | 27 | 3 |
| 25 | 26 | 27 | 28 | 3 |
| 25 | 26 | 27 | 69 | 3 |
| 25 | 26 | 27 | 70 | 3 |
| 26 | 27 | 28 | 29 | 3 |

```
69 27 28 29 3
70 27 28 29 3
26 27 28 71 3
69 27 28 71 3
70 27 28 71 3
26 27 28 72 3
70 27 28 72 3
27 28 29 73 3
71 28 29 73 3
72 28 29 73 3
```

```
[ dihedrals ]
#define improper_O_C_X_Y
```

```
[ pairs ]
; ai aj funct
 3 17 1
 3 30 1
 3 31 1
32 17 1
32 30 1
32 31 1
33 17 1
33 30 1
33 31 1
 4 2 1
 4 30 1
 4 31 1
18 1 1
18 32 1
18 33 1
19 2 1
57 2 1
58 2 1
17 6 1
17 34 1
17 35 1
 7 4 1
 7 34 1
 7 35 1
36 4 1
36 34 1
36 35 1
37 4 1
37 34 1
37 35 1
 8 5 1
 8 36 1
 8 37 1
38 5 1
38 36 1
38 37 1
39 5 1
39 36 1
39 37 1
 9 6 1
```

|    |    |   |
|----|----|---|
| 9  | 38 | 1 |
| 9  | 39 | 1 |
| 40 | 6  | 1 |
| 40 | 38 | 1 |
| 40 | 39 | 1 |
| 41 | 6  | 1 |
| 41 | 38 | 1 |
| 41 | 39 | 1 |
| 10 | 7  | 1 |
| 10 | 40 | 1 |
| 10 | 41 | 1 |
| 42 | 7  | 1 |
| 42 | 40 | 1 |
| 42 | 41 | 1 |
| 43 | 7  | 1 |
| 43 | 40 | 1 |
| 43 | 41 | 1 |
| 11 | 8  | 1 |
| 11 | 42 | 1 |
| 11 | 43 | 1 |
| 44 | 8  | 1 |
| 44 | 42 | 1 |
| 44 | 43 | 1 |
| 45 | 8  | 1 |
| 45 | 42 | 1 |
| 45 | 43 | 1 |
| 12 | 9  | 1 |
| 12 | 44 | 1 |
| 12 | 45 | 1 |
| 46 | 9  | 1 |
| 46 | 44 | 1 |
| 46 | 45 | 1 |
| 47 | 9  | 1 |
| 47 | 44 | 1 |
| 47 | 45 | 1 |
| 13 | 10 | 1 |
| 13 | 46 | 1 |
| 13 | 47 | 1 |
| 48 | 10 | 1 |
| 48 | 46 | 1 |
| 48 | 47 | 1 |
| 49 | 10 | 1 |
| 49 | 46 | 1 |
| 49 | 47 | 1 |
| 14 | 11 | 1 |
| 14 | 48 | 1 |
| 14 | 49 | 1 |
| 50 | 11 | 1 |
| 50 | 48 | 1 |
| 50 | 49 | 1 |
| 51 | 11 | 1 |
| 51 | 48 | 1 |
| 51 | 49 | 1 |
| 15 | 12 | 1 |
| 15 | 50 | 1 |
| 15 | 51 | 1 |

|    |    |   |
|----|----|---|
| 52 | 12 | 1 |
| 52 | 50 | 1 |
| 52 | 51 | 1 |
| 53 | 12 | 1 |
| 53 | 50 | 1 |
| 53 | 51 | 1 |
| 54 | 13 | 1 |
| 54 | 52 | 1 |
| 54 | 53 | 1 |
| 55 | 13 | 1 |
| 55 | 52 | 1 |
| 55 | 53 | 1 |
| 56 | 13 | 1 |
| 56 | 52 | 1 |
| 56 | 53 | 1 |
| 20 | 3  | 1 |
| 20 | 57 | 1 |
| 20 | 58 | 1 |
| 59 | 3  | 1 |
| 59 | 57 | 1 |
| 59 | 58 | 1 |
| 60 | 3  | 1 |
| 60 | 57 | 1 |
| 60 | 58 | 1 |
| 21 | 18 | 1 |
| 21 | 59 | 1 |
| 21 | 60 | 1 |
| 22 | 19 | 1 |
| 61 | 19 | 1 |
| 62 | 19 | 1 |
| 23 | 20 | 1 |
| 23 | 61 | 1 |
| 23 | 62 | 1 |
| 63 | 20 | 1 |
| 63 | 61 | 1 |
| 63 | 62 | 1 |
| 64 | 20 | 1 |
| 64 | 61 | 1 |
| 64 | 62 | 1 |
| 24 | 21 | 1 |
| 24 | 63 | 1 |
| 24 | 64 | 1 |
| 25 | 22 | 1 |
| 65 | 22 | 1 |
| 66 | 22 | 1 |
| 26 | 23 | 1 |
| 26 | 65 | 1 |
| 26 | 66 | 1 |
| 67 | 23 | 1 |
| 67 | 65 | 1 |
| 67 | 66 | 1 |
| 68 | 23 | 1 |
| 68 | 65 | 1 |
| 68 | 66 | 1 |
| 27 | 24 | 1 |
| 27 | 67 | 1 |

|    |    |   |
|----|----|---|
| 27 | 68 | 1 |
| 28 | 25 | 1 |
| 69 | 25 | 1 |
| 70 | 25 | 1 |
| 29 | 26 | 1 |
| 29 | 69 | 1 |
| 29 | 70 | 1 |
| 71 | 26 | 1 |
| 71 | 69 | 1 |
| 71 | 70 | 1 |
| 72 | 26 | 1 |
| 72 | 69 | 1 |
| 72 | 70 | 1 |
| 73 | 27 | 1 |
| 73 | 71 | 1 |
| 73 | 72 | 1 |

**Table S.2**

The calculated atomic charges of PEGML by using RESP.

```
[ moleculetype ]
; Name      nrexcl
PEGML      3

[ atoms ]
; nr  type   resnr residue  atom  cgnr  charge  mass
  1  opls_490  1  ML  C1    1    0.3691043962  12.011
  2  opls_182  1  ML  C2    2    0.4689230369  12.011
  3  opls_180  1  ML  O1    2   -0.8364129330  15.9994
  4  opls_465  1  ML  C3    3    1.2539006151  12.011
  5  opls_136  1  ML  C4    4   -0.6718680437  12.011
  6  opls_136  1  ML  C5    5    0.3319010221  12.011
  7  opls_136  1  ML  C6    6    0.0442016085  12.011
  8  opls_136  1  ML  C7    7   -0.1018270467  12.011
  9  opls_136  1  ML  C8    8    0.1084576434  12.011
 10  opls_136  1  ML  C9    9    0.0747121790  12.011
 11  opls_136  1  ML  C10   10   0.0550785378  12.011
 12  opls_136  1  ML  C11   11   0.0342192661  12.011
 13  opls_136  1  ML  C12   12   0.0147417429  12.011
 14  opls_136  1  ML  C13   13   0.1658651316  12.011
 15  opls_135  1  ML  C14   14  -0.2370784739  12.011
 16  opls_466  1  ML  O2    3   -0.7500293071  15.9994
 17  opls_467  1  ML  O3    3   -0.7930093275  15.9994
 18  opls_182  1  ML  C15   15   0.4998390010  12.011
 19  opls_182  1  ML  C16   16   0.5710990373  12.011
 20  opls_180  1  ML  O4    16  -0.8779960864  15.9994
 21  opls_182  1  ML  C17   17   0.5050389716  12.011
 22  opls_182  1  ML  C18   18   0.5744649402  12.011
 23  opls_180  1  ML  O5    18  -0.8796376655  15.9994
 24  opls_182  1  ML  C19   19   0.4919900476  12.011
 25  opls_182  1  ML  C20   20   0.5817423126  12.011
 26  opls_180  1  ML  O6    20  -0.8407686412  15.9994
 27  opls_182  1  ML  C21   21   0.3934631471  12.011
 28  opls_157  1  ML  C22   22   0.4218024291  12.011
 29  opls_154  1  ML  O7    22  -0.8769199458  15.9994
 30  opls_469  1  ML  H1    1    0.0253328963  1.008
 31  opls_469  1  ML  H2    1    0.0253328963  1.008
 32  opls_185  1  ML  H3    2   -0.0206468332  1.008
 33  opls_185  1  ML  H4    2   -0.0206468332  1.008
 34  opls_140  1  ML  H5    4    0.1504141913  1.008
 35  opls_140  1  ML  H6    4    0.1504141913  1.008
 36  opls_140  1  ML  H7    5   -0.0556463752  1.008
 37  opls_140  1  ML  H8    5   -0.0556463752  1.008
 38  opls_140  1  ML  H9    6   -0.0007769637  1.008
 39  opls_140  1  ML  H10   6   -0.0007769637  1.008
 40  opls_140  1  ML  H11   7    0.0060006861  1.008
 41  opls_140  1  ML  H12   7    0.0060006861  1.008
 42  opls_140  1  ML  H13   8   -0.0377254766  1.008
 43  opls_140  1  ML  H14   8   -0.0377254766  1.008
 44  opls_140  1  ML  H15   9   -0.0266833354  1.008
```

|    |          |   |    |     |    |               |       |
|----|----------|---|----|-----|----|---------------|-------|
| 45 | opls_140 | 1 | ML | H16 | 9  | -0.0266833354 | 1.008 |
| 46 | opls_140 | 1 | ML | H17 | 10 | -0.0276335919 | 1.008 |
| 47 | opls_140 | 1 | ML | H18 | 10 | -0.0276335919 | 1.008 |
| 48 | opls_140 | 1 | ML | H19 | 11 | -0.0271704691 | 1.008 |
| 49 | opls_140 | 1 | ML | H20 | 11 | -0.0271704691 | 1.008 |
| 50 | opls_140 | 1 | ML | H21 | 12 | -0.0135801452 | 1.008 |
| 51 | opls_140 | 1 | ML | H22 | 12 | -0.0135801452 | 1.008 |
| 52 | opls_140 | 1 | ML | H23 | 13 | -0.0319989990 | 1.008 |
| 53 | opls_140 | 1 | ML | H24 | 13 | -0.0319989990 | 1.008 |
| 54 | opls_140 | 1 | ML | H25 | 14 | 0.0532157898  | 1.008 |
| 55 | opls_140 | 1 | ML | H26 | 14 | 0.0532157898  | 1.008 |
| 56 | opls_140 | 1 | ML | H27 | 14 | 0.0532157898  | 1.008 |
| 57 | opls_185 | 1 | ML | H28 | 15 | -0.0430744089 | 1.008 |
| 58 | opls_185 | 1 | ML | H29 | 15 | -0.0430744089 | 1.008 |
| 59 | opls_185 | 1 | ML | H30 | 16 | -0.0560840798 | 1.008 |
| 60 | opls_185 | 1 | ML | H31 | 16 | -0.0560840798 | 1.008 |
| 61 | opls_185 | 1 | ML | H32 | 17 | -0.0427736303 | 1.008 |
| 62 | opls_185 | 1 | ML | H33 | 17 | -0.0427736303 | 1.008 |
| 63 | opls_185 | 1 | ML | H34 | 18 | -0.0551028934 | 1.008 |
| 64 | opls_185 | 1 | ML | H35 | 18 | -0.0551028934 | 1.008 |
| 65 | opls_185 | 1 | ML | H36 | 19 | -0.0431525860 | 1.008 |
| 66 | opls_185 | 1 | ML | H37 | 19 | -0.0431525860 | 1.008 |
| 67 | opls_185 | 1 | ML | H38 | 20 | -0.0544585624 | 1.008 |
| 68 | opls_185 | 1 | ML | H39 | 20 | -0.0544585624 | 1.008 |
| 69 | opls_185 | 1 | ML | H40 | 21 | -0.0242281794 | 1.008 |
| 70 | opls_185 | 1 | ML | H41 | 21 | -0.0242281794 | 1.008 |
| 71 | opls_140 | 1 | ML | H42 | 22 | 0.0063324461  | 1.008 |
| 72 | opls_140 | 1 | ML | H43 | 22 | 0.0063324461  | 1.008 |
| 73 | opls_155 | 1 | ML | H44 | 22 | 0.4906676549  | 1.008 |

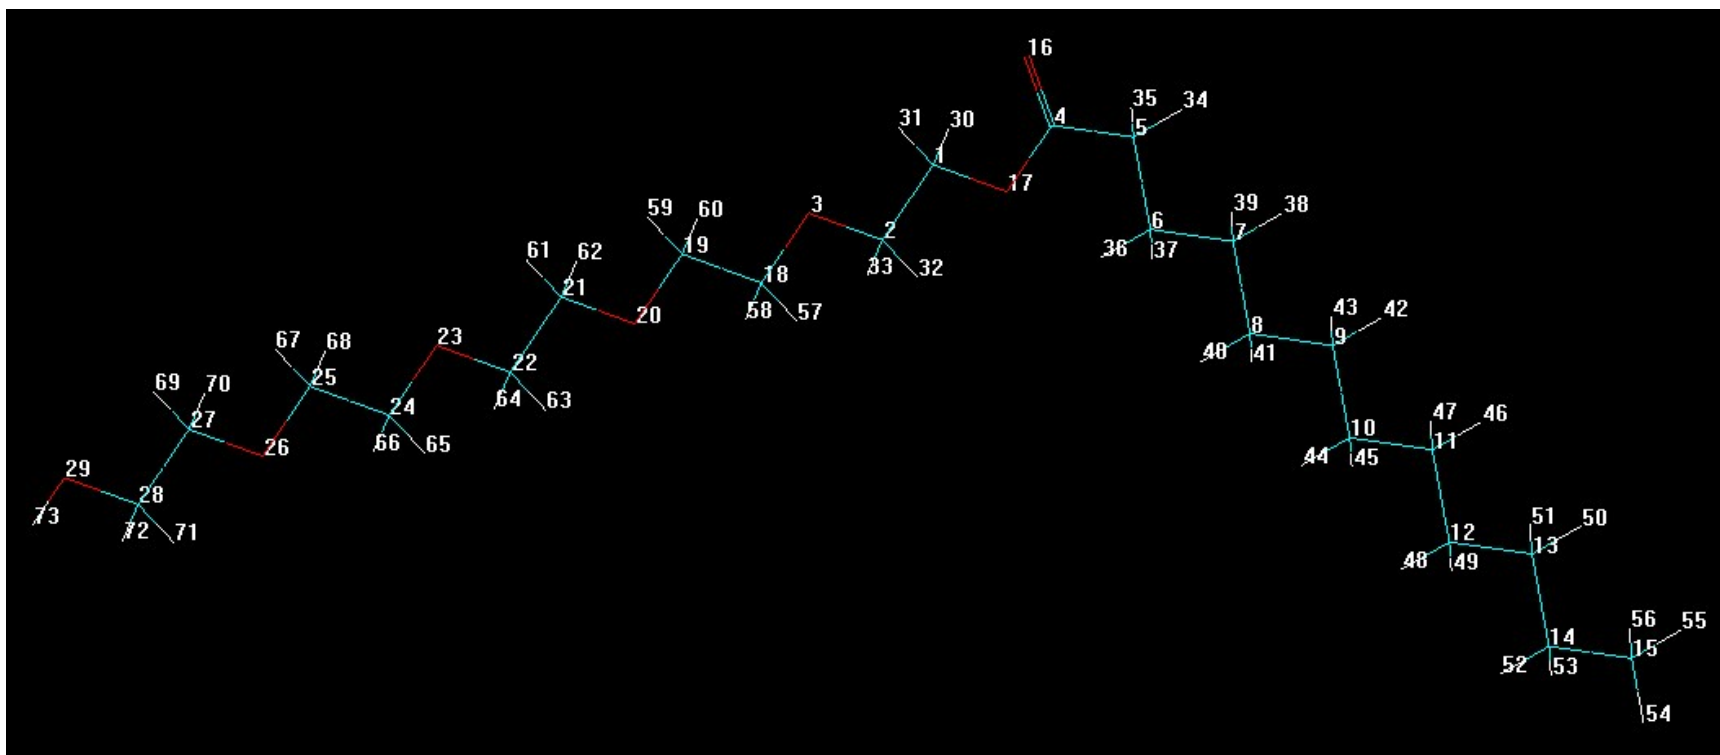

**Fig. A.1** PEGML molecule with its atomic numbering. The hydrogen atoms, including the polar hydrogen, were depicted by white color, carbon atoms by blue, and oxygen atoms by red.
